# Supplementary material for: Fractions of arsenic and selenium in fly ash by ultrasound-assisted sequential extraction
Source: Royal Society of Chemistry journal article supplement (doi:10.1039/c9ra08481a), 2020-01-01
Supplement: c9ra08481a1.pdf [file c9ra08481a1.pdf]

# **Fractionization of As and Se in Fly Ash by ultrasound-assisted sequential extraction**

Kai-Qiang He<sup>a</sup>, Chun-Gang Yuan\*<sup>a,b</sup>, Meng-Dan Shi<sup>a</sup>,

Yang-Hong Jiang<sup>a</sup>, Su-Juan Yu<sup>c</sup>

<sup>a</sup> *Hebei Key Lab of Power Plant Flue Gas Multi-Pollutants Control, Department of Environmental Science & Engineering, North China Electric Power University, Baoding 071000, China*

<sup>b</sup> *MOE Key Laboratory of Resources and Environmental Systems Optimization, College of Environmental Science and Engineering, North China Electric Power University, Beijing 102206, China*

<sup>c</sup> *State Key Laboratory of Environmental Chemistry and Ecotoxicology, Research Center for Eco-Environmental Sciences, Chinese Academy of Sciences, Beijing, 100085, China*

**Corresponding author: Chun-Gang Yuan**

**E-mail: [cgyuan@ncepu.edu.cn](mailto:cgyuan@ncepu.edu.cn)**

**Tel: +86-312-7525512**

**Fax: +86-312-752551**

**Number of pages: 4 (3 tables and 1 text)**

---

## **Table and Text titles**

**Table S1** Measurements conditions of the atomic fluorescence spectrometry.

**Table S2** Characteristics of the FA samples.

**Table S3** Digestion procedure of As and Se in F5.

**Text S1** The details of sampling sites and sampling procedures.

---

**Table S1**

Measurements conditions of the atomic fluorescence spectrometry.

| Parameter                  | As  | Se  |
|----------------------------|-----|-----|
| Negative high voltage (V)  | 270 | 280 |
| Lamp current (mA)          | 60  | 80  |
| Carrier gas flow (mL/min)  | 400 | 400 |
| Shielded gas flow (mL/min) | 800 | 800 |
| Reading time (s)           | 7.0 | 7.0 |
| Delay time (s)             | 1.1 | 1.2 |

**Table S2**

Characteristics of the FA samples.

| Samples | pH   | Major elements(%) |     |     |      |      | Size distribution( $\mu\text{m}$ ) |       |        |
|---------|------|-------------------|-----|-----|------|------|------------------------------------|-------|--------|
|         |      | Ca                | K   | Fe  | Al   | Si   | D10                                | D50   | D90    |
| 1       | 10.5 | 4.3               | 1.7 | 6.7 | 29.9 | 51.0 | 1.64                               | 7.60  | 17.91  |
| 2       | 8.7  | 3.0               | 1.8 | 7.6 | 33.1 | 46.9 | 14.76                              | 47.34 | 120.01 |
| 3       | 9.8  | 5.2               | 1.0 | 4.1 | 37.5 | 45.6 | 2.74                               | 10.55 | 32.50  |
| 4       | 11.6 | 7.1               | 1.1 | 4.0 | 33.6 | 48.1 | 4.93                               | 26.55 | 119.75 |
| 5       | 10.9 | 4.1               | 2.3 | 9.5 | 19.5 | 59.1 | 2.65                               | 29.64 | 159.53 |
| 6       | 9.2  | 2.9               | 1.1 | 6.8 | 33.6 | 49.9 | 1.69                               | 7.60  | 19.26  |

D10, D50, D90: The particle size of the sample whose cumulative particle distribution reaches 10%, 50%, and 90%, respectively.

---

**Table S3**

Digestion procedure of As and Se in F5.

| Step               | 1    | 2    | 3    | 4    |
|--------------------|------|------|------|------|
| Pressure(MPA)      | 1.0  | 1.5  | 2.0  | 2.5  |
| Temperature(°C)    | 100  | 130  | 160  | 180  |
| Power(W)           | 3000 | 3000 | 3000 | 3000 |
| Heating up time(s) | 500  | 200  | 200  | 500  |
| Holding time(s)    | 60   | 60   | 60   | 1200 |

---

**Text S1**

The details of sampling sites and sampling procedures.

Six fly ash (FA) samples were collected from six power plants located in Hebei Province, China. There were Matou Power Plant, Hengshui Thermal Power Plant, Tangshan Power Plant, Zhangjiakou Power Plant, Chengde Thermal Power Plant and Xingtai Power Plant, respectively. The circulating fluidized bed boiler is equipped with a fabric filter used for fly ash capture. According to the small amount of samples collected every day, FA sample in one power plant was collected over three continuous working days. Then the samples collected from same power plant were mixed into one composite sample of fly ash. All the samples were ground, freeze-dried and sieved through 100 mesh for use.
